# Supplementary material
Source: PubMed Central journal article supplement (PMC2839161)
Supplement: NIHMS161811-supplement-01.pdf [file NIHMS161811-supplement-01.pdf]

|                                      | <b>PicoLab20 Mouse Diet</b> | <b>Harlan-Teklad 22/5 Diet</b> |
|--------------------------------------|-----------------------------|--------------------------------|
| <b>protein content (%)</b>           | 21.8                        | 22.6                           |
| <b>fat content (%)</b>               | 9.0                         | 5.2                            |
| <b>crude fiber content (%)</b>       | 2.2                         | 3.9                            |
| <b>carbohydrate content (%)</b>      | 53.0                        | 51.2                           |
| <b>ash content (%)</b>               | 5.0                         | 7.1                            |
| <b>gross energy (kcal/g)</b>         | 4.2                         | 3.8                            |
| <b>metabolizable energy (kcal/g)</b> | 3.6                         | 3.1                            |

**Supplementary Table.** Dietary properties of the PicoLab20 Mouse diet (#5058) and the Harlan-Teklad 22/5 Rodent diet (#8640). These data were provided by the manufacturers.
